EDITORIAL

# *PLOS Biology* 2017 Reviewer and Editorial Board Thank You

PLOS and the *PLOS Biology* team would like to express our appreciation for our academic editors, guest editors, and reviewers who contributed to the peer-review process this past year. We are indebted to our volunteers who generously give their time and expertise to thoroughly review research and advance Open Access. In 2017, *PLOS Biology* received the help of 178 Editorial Board members and 131 guest editors to curate 2,743 submissions. Along with the participation of 1,481 reviewers, we were able to publish 160 articles with meaningful and impactful results.

The names of our 2017 editors that handled submitted manuscripts appear in the Supporting Information as [S1 Editor List](#) and as [S1 Guest Editor List](#). Our reviewers appear in the Supporting Information as [S1 Reviewer List](#). With genuine gratitude, we thank you all for your dedicated support for *PLOS Biology* and our efforts to promote Open Science, thereby contributing to the scientific community as a whole. Thank you all.

## Supporting information

**S1 Editor List. Alphabetical list of 2017 *PLOS Biology* Editorial Board Members.**  
(PDF)

**S1 Guest Editor List. Alphabetical list of 2017 *PLOS Biology* Guest Editors.**  
(PDF)

**S1 Reviewer List. Alphabetical list of 2017 *PLOS Biology* peer reviewers.**  
(PDF)

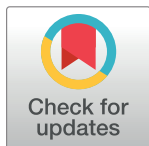

## OPEN ACCESS

**Citation:** (2018) *PLOS Biology* 2017 Reviewer and Editorial Board Thank You. PLoS Biol 16(3): e2006030. <https://doi.org/10.1371/journal.pbio.2006030>

**Published:** March 19, 2018

**Copyright:** © 2018 The PLOS Biology Staff. This is an open access article distributed under the terms of the [Creative Commons Attribution License](#), which permits unrestricted use, distribution, and reproduction in any medium, provided the original author and source are credited.

**Funding:** The author(s) received no specific funding for this work.

**Competing interests:** The authors have declared that no competing interests exist.

## References

1. (2017) *PLOS Biology* 2016 Reviewer and Editorial Board Thank You. PLoS Biol 15(3): e2002409. <https://doi.org/10.1371/journal.pbio.2002409>
2. (2016) *PLOS Biology* 2015 Reviewer Thank You. PLoS Biol 14(2): e1002406. <https://doi.org/10.1371/journal.pbio.1002406>
3. (2015) *PLOS Biology* 2014 Reviewer Thank You. PLoS Biol 13(2): e1002101. <https://doi.org/10.1371/journal.pbio.1002101>
